# Supplementary material
Source: Research Square preprint supplement (doi:10.21203/rs.3.rs-8316847/v1)
Supplement: Supplementary file 1 [file 6f644c6c692e7b638991043c.docx]

# SPIRIT 2013 Checklist – EQUITA Protocol (Completed)

| Section/item | Item No | Description | Addressed in EQUITA Protocol |
| --- | --- | --- | --- |
| Administrative information |  |  |  |
| Title | 1 | Descriptive title identifying the study design, population, interventions, and, if applicable, trial acronym | EQUITy in Black Adult health (EQUITA): a randomised feasibility trial of a co-produced and faith-placed intervention to increase screening uptake among Black communities in the UK. |
| Trial registration | 2a | Trial identifier and registry name. If not yet registered, name of intended registry | ClinicalTrials.gov Identifier: NCT06981182 |
| Trial registration | 2b | All items from the World Health Organization Trial Registration Data Set | All WHO Trial Registration Data Set items are publicly available on ClinicalTrials.gov under identifier NCT06981182 |
| Protocol version | 3 | Date and version identifier | Version 5.0, dated 10/11/2025 |
| Funding | 4 | Sources and types of financial, material, and other support | Outlined in abstract and declarations.  This study is funded by the National Institute for Health and Social Care (NIHR) (Project reference 164073). |
| Roles and responsibilities | 5a | Names, affiliations, and roles of protocol contributors | Described under project management section; PI and co-leads (JE and FC) responsible for daily management. |
| Roles and responsibilities | 5b | Name and contact information for the trial sponsor | not applicable |
|  | 5c | Role of study sponsor and funders, if any, in study design; collection, management, analysis, and interpretation of data; writing of the report; and the decision to submit the report for publication, including whether they will have ultimate authority over any of these activities | not applicable |
|  | 5d | Composition, roles, and responsibilities of the coordinating centre, steering committee, endpoint adjudication committee, data management team, and other individuals or groups overseeing the trial, if applicable (see Item 21a for data monitoring committee) | Addressed in ‘project management’ section |
| Introduction |  |  |  |
| Background and rationale | 6a | Description of research question and justification for undertaking the trial, including summary of relevant studies (published and unpublished) examining benefits and harms for each intervention | Background provided in ‘Background’ section; rationale provided in ‘Review of existing evidence and rationale’ section |
|  | 6b | Explanation for choice of comparators | Addressed in ‘Work Package 2 — Delivery of the feasibility trial’ |
| Objectives | 7 | Specific objectives or hypotheses | Addressed in ‘Study objectives and research questions’ |
| Trial design | 8 | Description of trial design including type of trial (eg, parallel group, crossover, factorial, single group), allocation ratio, and framework (eg, superiority, equivalence, noninferiority, exploratory) | Adressed in ‘Design’ (Methods) and ‘Work Package 2 — Delivery of the feasibility trial’; see also Figure 1 (SPIRIT schedule).  Cluster-randomised, two-arm feasibility trial using mixed methods. |
| Methods: Participants, interventions, and outcomes |  |  |  |
| Study setting | 9 | Description of study settings (eg, community clinic, academic hospital) and list of countries where data will be collected. Reference to where list of study sites can be obtained | Outlined in ‘Setting’.  Churches in Glasgow, North East of England, and Leeds. |
| Eligibility criteria | 10 | Inclusion and exclusion criteria for participants. If applicable, eligibility criteria for study centres and individuals who will perform the interventions (eg, surgeons, psychotherapists) | Outlined in ‘Study population’.  Black adults aged 25–74 (female) and 50–74 (male), not up-to-date with all eligible screenings. |
| Interventions | 11a | Interventions for each group with sufficient detail to allow replication, including how and when they will be administered | Outlined in ‘Work Package 1 (WP1)—Adaptation of intervention’.  Peer-led, co-produced workshop adapted from prior studies (IMCAN, PROCAN-B), with health education, testimonials, and community discussion. |
| Interventions | 11b | Criteria for discontinuing or modifying allocated interventions for a given trial participant (eg, drug dose change in response to harms, participant request, or improving/worsening disease) | not applicable |
| Interventions | 11c | Strategies to improve adherence to intervention protocols, and any procedures for monitoring adherence (eg, drug tablet return, laboratory tests) | Addressed in ‘Work Package 2 – Delivery of the feasibility trial’; ‘Work Package 3 – Qualitative Process Evaluation’ |
| Interventions | 11d | Relevant concomitant care and interventions that are permitted or prohibited during the trial | not applicable |
| Outcomes | 12 | Primary, secondary, and other outcomes, including the specific measurement variable (eg, systolic blood pressure), analysis metric (eg, change from baseline, final value, time to event), method of aggregation (eg, median, proportion), and time point for each outcome. Explanation of the clinical relevance of chosen efficacy and harm outcomes is strongly recommended | Addressed in ‘Work Package 2 – Delivery of the feasibility trial’; ‘Outcomes’ section; Figure 1 (SPIRIT schedule).  Feasibility outcomes and secondary outcomes, including knowledge, attitudes, and screening uptake. |
| Participant timeline | 13 | Time schedule of enrolment, interventions (including any run-ins and washouts), assessments, and visits for participants. A schematic diagram is highly recommended (see Figure) | Outlined in Figure 1 (SPIRIT schedule) and in ‘Methods – Study design and setting’. |
| Sample size | 14 | Estimated number of participants needed to achieve study objectives and how it was determined, including clinical and statistical assumptions supporting any sample size calculations | Outlined in ‘Work package 2 - Sample and recruitment’  Feasibility sample of 300 participants (150 per arm, 100 per site). |
| Recruitment | 15 | Strategies for achieving adequate participant enrolment to reach target sample size | Addressed in ‘Work Package 2 – Delivery of the feasibility trial’; ‘Methods – Recruitment and participant eligibility’.  Purposive and snowball sampling through churches and Recruitment Leads. |
| Methods: Assignment of interventions (for controlled trials) |  |  |  |
| Allocation: |  |  |  |
| Sequence generation | 16a | Method of generating the allocation sequence (eg, computer-generated random numbers), and list of any factors for stratification. To reduce predictability of a random sequence, details of any planned restriction (eg, blocking) should be provided in a separate document that is unavailable to those who enrol participants or assign interventions | Addressed in ‘Methods’ — Work Package 2.  Allocation will be computer-generated by an independent statistician at the Robertson Centre for Biostatistics (RCB) at the cluster (church) level. Matched-pair randomisation within site will be used: within each study site, churches will be matched on local deprivation (Index of Multiple Deprivation profile) and then randomised 1:1 within each pair to intervention or wait-list control. If an odd number of churches remains within a site, the unmatched cluster(s) will be assigned using simple randomisation. Details of any randomisation restrictions and the seed are documented in a separate RCB randomisation file that is not available to site staff who enrol participants or deliver the intervention. |
| Allocation concealment mechanism | 16b | Mechanism of implementing the allocation sequence (eg, central telephone; sequentially numbered, opaque, sealed envelopes), describing any steps to conceal the sequence until interventions are assigned | Addressed in ‘Work Package 2—Delivery of the feasibility trial’.  The randomisation sequence will be implemented centrally by the Robertson Centre for Biostatistics (RCB) to ensure concealment. Following baseline data collection and confirmation of eligible churches, the RCB will perform randomisation and communicate allocation directly to the Chief Investigator, who will in turn notify Community Research Leads (CRLs) of church assignments.  Church-level allocation will therefore remain concealed from field teams and participants until after baseline assessment. No local randomisation lists or envelopes will be used, and all allocation files will be stored securely on the RCB server, accessible only to authorised RCB personnel. |
| Implementation | 16c | Who will generate the allocation sequence, who will enrol participants, and who will assign participants to interventions | Addressed in ‘Work Package 2 — Delivery of the feasibility trial’.  The allocation sequence will be generated by an independent statistician at the Robertson Centre for Biostatistics (RCB) using a computer-based randomisation algorithm.  Participant enrolment will be undertaken by Community Research Leads (CRLs), who will provide study information, obtain written informed consent, and verify eligibility before baseline data collection.  Assignment of clusters (churches) to intervention or wait-list control will be performed centrally by the RCB statistician, who will communicate the allocation to the Chief Investigator after all baseline data have been collected. The Chief Investigator will then inform CRLs of the group assignments for implementation. |
| Blinding (masking) | 17a | Who will be blinded after assignment to interventions (eg, trial participants, care providers, outcome assessors, data analysts), and how | not applicable |
|  | 17b | If blinded, circumstances under which unblinding is permissible, and procedure for revealing a participant’s allocated intervention during the trial | not applicable |
| Methods: Data collection, management, and analysis |  |  |  |
| Data collection methods | 18a | Plans for assessment and collection of outcome, baseline, and other trial data, including any related processes to promote data quality (eg, duplicate measurements, training of assessors) and a description of study instruments (eg, questionnaires, laboratory tests) along with their reliability and validity, if known. Reference to where data collection forms can be found, if not in the protocol | Outlined in ‘Methods for data collection’. |
|  | 18b | Plans to promote participant retention and complete follow-up, including list of any outcome data to be collected for participants who discontinue or deviate from intervention protocols | Addressed in ‘Work Package 2 – Delivery of the feasibility trial’; ‘Work Package 3 – Process evaluation’; ‘Data management’ section. |
| Data management | 19 | Plans for data entry, coding, security, and storage, including any related processes to promote data quality (eg, double data entry; range checks for data values). Reference to where details of data management procedures can be found, if not in the protocol | Outlined in ‘Data management’ section. |
| Statistical methods | 20a | Statistical methods for analysing primary and secondary outcomes. Reference to where other details of the statistical analysis plan can be found, if not in the protocol | Outlined in ‘Data and statistical analysis’.  Descriptive statistics, mixed-effects regressions, confidence intervals, t-tests. ICCs calculated. |
|  | 20b | Methods for any additional analyses (eg, subgroup and adjusted analyses) | Outlined in ‘Data and statistical analysis’.  No formal hypothesis testing is planned. Analyses will be primarily descriptive, focusing on feasibility parameters and estimation of recruitment, retention, data completeness, and ICCs. Exploratory analyses may summarise outcomes by site and participant characteristics to inform the design of a definitive trial. |
|  | 20c | Definition of analysis population relating to protocol non-adherence (eg, as randomised analysis), and any statistical methods to handle missing data (eg, multiple imputation) | Outlined in ‘Data and statistical analysis’.  Analyses will be descriptive and follow an intention-to-treat approach at the cluster level. All participants from randomised churches will be included in analyses regardless of intervention attendance. Missing data will not be imputed; rates and patterns of missingness will be described to inform procedures for a future definitive trial. |
| Methods: Monitoring |  |  |  |
| Data monitoring | 21a | Composition of data monitoring committee (DMC); summary of its role and reporting structure; statement of whether it is independent from the sponsor and competing interests; and reference to where further details about its charter can be found, if not in the protocol. Alternatively, an explanation of why a DMC is not needed | Outlined in ‘Project management’.  Steering Committee will provide oversight; no independent data monitoring committee. |
|  | 21b | Description of any interim analyses and stopping guidelines, including who will have access to these interim results and make the final decision to terminate the trial | Addressed in ‘Methods for data collection’.  STOP-AMEND-GO progression criteria and a traffic light system will indicate whether or how to proceed to a definitive trial. Progress against these criteria will be reviewed by the Study Steering Committee at scheduled intervals. |
| Harms | 22 | Plans for collecting, assessing, reporting, and managing solicited and spontaneously reported adverse events and other unintended effects of trial interventions or trial conduct | Outlined in ‘Research governance and ethics approval’ and ‘Data management’ sections.  No adverse events anticipated due to low-risk nature of study. Support provided as needed. |
| Auditing | 23 | Frequency and procedures for auditing trial conduct, if any, and whether the process will be independent from investigators and the sponsor | Outlined in ‘Project management’,  Internal monitoring via Study Steering Committee. |
| Ethics and dissemination |  |  |  |
| Research ethics approval | 24 | Plans for seeking research ethics committee/institutional review board (REC/IRB) approval | Addressed in ‘Research governance and ethics approval’. |
| Protocol amendments | 25 | Plans for communicating important protocol modifications (eg, changes to eligibility criteria, outcomes, analyses) to relevant parties (eg, investigators, REC/IRBs, trial participants, trial registries, journals, regulators) | Outlined in ‘Project management’.  Any protocol amendments will be reviewed and approved by the sponsor and Research Ethics Committee before implementation, with updates communicated to the SSC, funder, and trial registry, and to participants if changes may affect their involvement. |
| Consent or assent | 26a | Who will obtain informed consent or assent from potential trial participants or authorised surrogates, and how (see Item 32) | Addressed in ‘Work Package 2 – Delivery of the feasibility trial’.  Written informed consent will be obtained by trained Community Research Leads or peer facilitators before any study activities. Participants will receive an information sheet and may ask questions before signing. Participation is voluntary, and withdrawal is possible at any time without consequence. |
|  | 26b | Additional consent provisions for collection and use of participant data and biological specimens in ancillary studies, if applicable | not applicable |
| Confidentiality | 27 | How personal information about potential and enrolled participants will be collected, shared, and maintained in order to protect confidentiality before, during, and after the trial | Outlined in ‘Data management’.  Personal data will be stored securely and separately from research data; anonymisation procedures in place. |
| Declaration of interests | 28 | Financial and other competing interests for principal investigators for the overall trial and each study site | Outlined in Declarations section.  No competing interests declared. |
| Access to data | 29 | Statement of who will have access to the final trial dataset, and disclosure of contractual agreements that limit such access for investigators | Outlined in Declarations section and in ‘Data management’.  The Robertson Centre for Biostatistics will hold the master pseudonymised dataset. The Chief Investigator and authorised statisticians will have full access for analysis. No contractual agreements restrict investigator access. Data will be archived on the University of Sunderland SURE repository after study completion. |
| Ancillary and post-trial care | 30 | Provisions, if any, for ancillary and post-trial care, and for compensation to those who suffer harm from trial participation | Not applicable – no clinical intervention. |
| Dissemination policy | 31a | Plans for investigators and sponsor to communicate trial results to participants, healthcare professionals, the public, and other relevant groups (eg, via publication, reporting in results databases, or other data sharing arrangements), including any publication restrictions | Outlined in ‘Dissemination, outputs, and anticipated impact’.  Findings will be shared with participants, communities, and stakeholders through local dissemination events and accessible plain-language summaries co-produced with the PICE group. Results will be published in peer-reviewed journals, presented at academic conferences and community events |
|  | 31b | Authorship eligibility guidelines and any intended use of professional writers | Addressed in Declarations section. |
|  | 31c | Plans, if any, for granting public access to the full protocol, participant-level dataset, and statistical code | Addressed in Declarations section. |
| Appendices |  |  |  |
| Informed consent materials | 32 | Model consent form and other related documentation given to participants and authorised surrogates |  |
| Biological specimens | 33 | Plans for collection, laboratory evaluation, and storage of biological specimens for genetic or molecular analysis in the current trial and for future use in ancillary studies, if applicable | not applicable |
