# Supplementary material
Source: Research Square preprint supplement (doi:10.21203/rs.3.rs-8316847/v1)
Supplement: Supplementary file 2 [file bede1d744007f264888a2ff5.docx]

Table S1. Preliminary progression criteria

| **Progression Criterion** | **Full Achievement (Indicator Green)** | **Partial Achievement (Indicator Amber)** | **Non-Achievement (Indicator Red)** | **Method of assessment** | **Rationale (including for target where appropriate)** |
| --- | --- | --- | --- | --- | --- |
| 1. Was recruitment of churches feasible? | Recruitment of a sufficient number and size of churches within 3 months to support the recruitment of approximately 100 participants per site | Church recruitment is delayed, or the number/size of churches raises concerns about ability to meet participant targets, but is still likely to support recruitment | Recruitment target not achieved  Church recruitment takes longer than 6 months or the number/size of churches is clearly insufficient to support participant recruitment targets. | Descriptive project monitoring data  Qualitative data-process evaluation | Assessing recruitment of churches is essential for progression to a definitive trial. Adhering to the project’s timeline as much as possible, we will aim to continue recruitment past 3 months until a sufficient number of churches has been recruited to support participant recruitment, and viability and fidelity of the trial. Similar research has had a church recruitment period range between 1 months to 9 months, with an average of 3.5-3 months (85), therefore our target of 3 months to reach the desired number of churches seems justified. |
| 2. Were churches  willing to be randomised? | All churches willing to be randomised. | Randomisation was achieved but was a barrier to some churches | Randomisation was a key barrier which prevented participation. | Descriptive project monitoring data, qualitative assessment | Willingness of churches to accept randomisation is essential for the validity and scalability of a potential definitive trial. If randomisation is not acceptable, recruitment will be biased and progression to a definitive trial may not be feasible. Qualitative process evaluation data should support understanding in challenges or non-acceptance of randomisation. |
| 3. Was participant recruitment feasible? | In each location and for each arm, at least 60% of participant recruitment is achieved within 5 months from the time of confirmed church recruitment. | In each location and for each arm, 40–59% of participant recruitment is achieved within 7 months. | Recruitment target less than 40% | Quantitative descriptive baseline data  Qualitative data: process evaluation | Assessing participant recruitment is essential for progression to a definitive trial. Based on our previous work, we consider a target of 60% of participant recruitment within 5 months, from the time of confirmed church recruitment. This target, within this timespan, seems feasible based on our experience (86,87), and on the literature (88–91). Not surpassing 7 months, adhering to the project’s timeline as much as possible, we will aim to continue recruitment past 5 months until a sufficient sample size and minimum of 100 participants per site is reached to ensure viability and fidelity of the trial. Rather than setting a sample size as progression criterion, the literature suggests to track the recruitment rate per site per month as the preferred method of evaluating feasibility (92). Therefore, careful tracking of recruitment, time period and rate of recruitment per site, is part of the feasibility trial.  Local context is important (92), which will be explored in the process evaluation. |
| 4. Was participant recruitment sufficient across all age groups to allow feasibility assessment for each of the four screening programmes? | Participant recruitment of all age groups aligned with each programme, was achieved. | Participant recruitment for one screening programme was lower than expected in a specific age group, but still sufficient to permit feasibility assessment. | Participant recruitment for at least one screening programme was insufficient (e.g., Black men 65+ was not achieved) | Quantitative descriptive baseline data  Qualitative data: process evaluation | Recruitment across all age groups is needed to assess feasibility in each of the four screening programmes. If one programme has lower recruitment, feasibility can still be assessed but with caution. If recruitment is insufficient for a programme, feasibility may be challenging for that group, or for that programme. |
| 5. What proportion of participants could be followed up at 3  months? | In each church and for each arm, at least 60% of participants could be followed up at 3 months | In each location and for each arm, between 40% and 59% of participant follow-up is achieved between 3-5 months | Follow up target was <40% | Quantitative descriptive follow-up data  Qualitative data: process evaluation | Assessing participant follow-up is essential for progression to a definitive trial. We consider a target of 60% follow-up reasonable considering our experience in previous research and the average rate of follow-up questionnaire completion in randomised trials is 40% (93). Qualitative process evaluation data will aim to understand what worked well regarding follow-up procedures, and what did not. |
| 6. Were consent procedures acceptable to  participants? | Consent procedures were acceptable to all participants | Consent procedures were acceptable to most participants, although some issues were raised | Procedures were not acceptable to participants | Qualitative data: process evaluation | Assessing acceptability of consent procedures is essential for progression to a definitive trial. If participants find consent procedures burdensome, confusing or difficult, this could impact on participation. Understanding participants’ views and experiences, will help shape appropriate consent procedures for a potential definitive trial. |
| 7. Were data collection tools  suitable? | Participant response rate >70% at baseline, participants express acceptability | Participant response rate >60%, participants mostly express tools to be acceptable | Response rate<50% and participants shared concern about  data collection tools | Quantitative descriptive data and qualitative data | Understanding acceptability of data collection measures through measuring response rate and exploring this qualitatively, is essential before progressing to a definitive trial. Based on our team’s experience in previous work and existing literature (93), we consider a response rate of 70% at baseline, sufficient to undertake analysis for feasibility and acceptability. |
| 8. Was obtaining actual NHS screening data acceptable to participants? | >50% of participants provide consent to obtaining NHS screening data | >40% of participants provide consent to obtaining NHS screening data | <40% of participants provide consent to obtaining NHS screening data | Quantitative descriptive follow-up data  Qualitative data: process evaluation | We will aim to collect NHS screening attendance as efficacy outcome as this will be required to measure impact in a definitive trial. However, based on our team’s experience in previous work, some participants may be reluctant to give consent. We have therefore set a pragmatic threshold of >50%, which would indicate sufficient acceptability to proceed, while allowing us to to explore reasons for non-consent qualitatively. |
| 9. Was obtaining actual NHS screening data feasible? | Actual screening data obtained from all 4 screening programmes, in both countries | Issues with obtaining actual screening data arise in at least 1 screening programme, in one location | Issues with obtaining actual screening data arise in more than 2 screening programmes | Descriptive project monitoring data  Qualitative data: process evaluation | We will aim to collect NHS screening attendance as efficacy outcome as this will be required to measure impact in a definitive trial. However, based on our team’s experience in previous work, obtaining these data can be problematic. If data cannot be obtained from one or more programmes, it may limit the ability to evaluate the intervention’s impact comprehensively. This criterion therefore assesses the practicality of working with screening data services, including approvals and timelines, to determine whether this element would be deliverable in a definitive trial. |
| 10. Was the intervention feasible and acceptable? | Intervention content and delivery were predominantly feasible and acceptable to all participants | Intervention content and delivery mostly feasible and acceptable to participants but some issues were  raised. | Major concerns about intervention delivery or content | Qualitative data: process evaluation | Understanding participants’ and stakeholders’ views on the feasibility and acceptability of the intervention, is essential for a definitive trial and potential implementation and scalability. Qualitative data will provide in-depth understanding regarding what worked well and what did not work well from all perspectives involved in the project. These data are key to both improving the trial, and the intervention. |
| 11. How many become peer facilitators, how many were trained within 4-5 months and retained at 3-month follow-up? | >80% of peer facilitators are recruited and trained within 4-5 months and retained at 3- months follow up (68,99). | Between 60% and <80% of the peers are recruited and trained within 4-5 months and retained at 3-month follow-up. | Amber target not achieved | Descriptive project monitoring data  Qualitative data: process evaluation | Peer-facilitators are central to the delivery and acceptability of this intervention. We consider a target of 80% within 4-5 months and retained at 3-months, reasonable considering our experience in previous research, and the amount of time and effort involved for peer-facilitators (86,87,94). This target allows for some shortfall, due to availability or drop-out, while still ensuring sufficient coverage to assess whether the peer-facilitator model is working for a definitive trial and future implementation. |

Note: Full (Green) target achieved: Very strong indication to proceed to a full trial. Partial (Amber) target achieved: Medium indication to proceed to a full trial. Further discussions need to take place with members of the research team, PICE and stakeholders to improve performance. It should be reviewed in context of relevant qualitative and quantitative data provided in this feasibility study. Non-achievement (Red) target: Indication of doubt as to whether to proceed to a full trial. Further discussions need to take place with members of the research team, PICE and stakeholders, review in context of relevant qualitative and quantitative data provided in here. Should only proceed if other indicators are full or partial and there is a clear strategy to improve performance of indicators.
